# Supplementary material
Source: PubMed Central journal article supplement (PMC3097398)

The Effect of the MassHealth Hospital Pay-for-Performance Program on Quality

APPENDIX

Manuscript number: HSR-10-0257

Andrew M. Ryan

Jan Blustein

## Appendix A. Supplemental Results

Table A1. Marginal effects for all variables in main specifications (Table 2) for pneumonia

|                                 | Model 1           | Model 2           | Model 3           | Model 4           | Model 5            |
|---------------------------------|-------------------|-------------------|-------------------|-------------------|--------------------|
| MassHealth                      | 0.70<br>(0.42)    | -.031<br>(0.43)   | 3.42***<br>(0.05) | -0.67<br>(0.51)   | 0.44<br>(0.54)     |
| Time                            | 2.07***<br>(0.02) | 0.11*<br>(0.06)   | .                 | .                 | -0.01<br>(0.07)    |
| Difficulty Index                | .                 | 1.11***<br>(0.03) | .                 | 1.05***<br>(0.02) | 1.12***<br>(0.03)  |
| For profit                      | .                 | .                 | .                 | .                 | -0.09<br>(0.25)    |
| Not for profit                  | .                 | .                 | .                 | .                 | 0.85<br>(0.21)     |
| 100-399 beds                    | .                 | .                 | .                 | .                 | 0.83***<br>(0.20)  |
| Over 400 beds                   | .                 | .                 | .                 | .                 | 0.42<br>(0.34)     |
| Urban                           | .                 | .                 | .                 | .                 | -0.02<br>(0.19)    |
| Teaching affiliation            | .                 | .                 | .                 | .                 | -0.61***<br>(0.20) |
| Major Teaching (member of COTH) | .                 | .                 | .                 | .                 | -0.62**<br>(0.30)  |
| % Medicaid discharges           | .                 | .                 | .                 | .                 | -0.0001<br>(0.001) |
| % Medicare discharges           | .                 | .                 | .                 | .                 | -0.07***<br>(0.01) |

Note: Standard errors are displayed in parentheses (). Models 1-4 show cluster robust (at the hospital level) standard errors while Model 5 shows standard errors that are robust to arbitrary heteroskedasticity.

Note: The marginal effect on Time is the average marginal effect

Note: Marginal effects on time don't appear in trend models because models are detrended, and time effects are not estimated

Table A2. Marginal effects for all variables in main specifications (Table 2) for surgical infection prevention

|                                 | Model 1            | Model 2            | Model 3           | Model 4            | Model 5            |
|---------------------------------|--------------------|--------------------|-------------------|--------------------|--------------------|
| MassHealth                      | -3.45***<br>(0.87) | -2.92***<br>(0.86) | -1.89**<br>(0.75) | -0.12***<br>(0.77) | 0.05<br>(1.04)     |
| Time                            | 6.18***<br>(0.08)  | 1.23***<br>(0.28)  |                   | .                  | 3.03***<br>(0.21)  |
| Difficulty Index                |                    | 0.89***<br>(0.05)  | .                 | 1.07***<br>(0.04)  | 0.53***<br>(0.04)  |
| For profit                      | .                  | .                  | .                 | .                  | -0.98<br>(0.60)    |
| Not for profit                  | .                  | .                  | .                 | .                  | 1.40***<br>(0.49)  |
| 100-399 beds                    | .                  | .                  | .                 | .                  | 1.16***<br>(0.47)  |
| Over 400 beds                   | .                  | .                  | .                 | .                  | 1.84**<br>(0.75)   |
| Urban                           | .                  | .                  | .                 | .                  | 0.65<br>(0.45)     |
| Teaching affiliation            | .                  | .                  | .                 | .                  | 1.26***<br>(0.40)  |
| Major Teaching (member of COTH) | .                  | .                  | .                 | .                  | 2.85***<br>(0.58)  |
| % Medicaid discharges           | .                  | .                  | .                 | .                  | 0.03***<br>(0.002) |
| % Medicare discharges           | .                  | .                  | .                 | .                  | -0.17***<br>(0.02) |

Note: Standard errors are displayed in parentheses (). Models 1-4 show cluster robust (at the hospital level) standard errors while Model 5 shows standard errors that are robust to arbitrary heteroskedasticity.

Note: The marginal effect on Time is the average marginal effect

Note: Marginal effects on time don't appear in trend models because each hospital is given its own quadratic trend

Table A3. Sensitivity Estimates of the Effect of the MassHealth P4P program on Process Quality

|         | <i>PHQID<br/>exclusion</i> | <i>Assume<br/>anticipation<br/>effect</i> | <i>Matched<br/>Sample</i> | <i><u>Pneumonia</u></i>      |          |                        | <i><u>Surgical Infection Prevention</u></i> |          |                        |
|---------|----------------------------|-------------------------------------------|---------------------------|------------------------------|----------|------------------------|---------------------------------------------|----------|------------------------|
|         |                            |                                           |                           | <i>MassHealth<br/>effect</i> | <i>n</i> | <i>N<br/>hospitals</i> | <i>MassHealth<br/>effect</i>                | <i>n</i> | <i>N<br/>hospitals</i> |
| Model 6 | X                          |                                           |                           | -0.83<br>(0.53)              | 18,181   | 3,123                  | -0.04<br>(0.81)                             | 12,652   | 2,919                  |
| Model 7 |                            | X                                         |                           | -0.35<br>(0.35)              | 19,437   | 3,356                  | 0.53<br>(0.76)                              | 13,619   | 3,147                  |
| Model 8 |                            |                                           | X                         | -0.82<br>(0.58)              | 698      | 118                    | -0.96<br>(1.76)                             | 441      | 94                     |
| Model 9 | X                          | X                                         | X                         | -1.52*<br>(0.82)             | 660      | 112                    | -0.70<br>(1.89)                             | 413      | 88                     |

\*  $p < .10$

Note: All Models are estimated with the difficulty control, hospital fixed effects, and hospital-specific quadratic trends.

Note: Cluster-robust standard errors are displayed in parentheses ( )

Table A4. Effects of MassHealth P4P Program on Quality Across Hospital Characteristics (Model 10)

| VARIABLES                              | Pneumonia          | Surgical Infection Prevention |
|----------------------------------------|--------------------|-------------------------------|
| MassHealth                             | -4.87***<br>(1.51) | 4.31<br>(2.91)                |
| MassHealth · not for profit            | 1.32<br>(1.59)     | -2.05<br>(2.38)               |
| MassHealth · 100-399 beds              | 2.67<br>(1.56)     | -1.31<br>(2.09)               |
| MassHealth · Over 400 beds             | 0.56<br>(2.86)     | 1.34<br>(3.3)                 |
| MassHealth · Urban                     | 0.58<br>(1.07)     | -1.34<br>(1.96)               |
| MassHealth · Teaching affiliation      | 0.71<br>(.97)      | 0.04<br>(1.77)                |
| MassHealth · Teaching (member of COTH) | 0.83<br>(2.04)     | -0.08<br>(2.2)                |
| MassHealth · % Medicaid discharges     | 3.71<br>(6.08)     | 4.51<br>(12.03)               |
| MassHealth · % Medicare discharges     | 3.81<br>(5.44)     | -7.47<br>(7.84)               |
| Difficulty Index                       | 1.04***<br>(0.02)  | 1.07***<br>(0.04)             |
| Observations                           | 19,219             | 13,423                        |
| Number of hospitals                    | 3,278              | 3,080                         |

\*\*\* p<0.01

Note: Heteroskedasticity-consistent standard errors, clustered on hospitals, are displayed in parentheses ( )

Note: Models include hospital fixed effects and quadratic time trends

Note: Reference category is hospital with graduate or no medical school affiliation, under 100 beds, government or for-profit owned. Model is also estimated at the mean proportion of Medicaid and Medicare discharges

Table A5. Estimates of the Effect of the MassHealth P4P program on Process Quality: Lowest quartile of Medicaid share discharges

|          | <i>Fixed Effects</i> | <i>Difficulty Index</i> | <i>Trends</i> | <u><i>Pneumonia</i></u>  |          |                    | <u><i>Surgical Infection Prevention</i></u> |          |                    |
|----------|----------------------|-------------------------|---------------|--------------------------|----------|--------------------|---------------------------------------------|----------|--------------------|
|          |                      |                         |               | <i>MassHealth effect</i> | <i>N</i> | <i>N hospitals</i> | <i>MassHealth effect</i>                    | <i>N</i> | <i>N hospitals</i> |
| Model 11 | X                    |                         |               | 1.05<br>(0.71)           | 4,324    | 748                | -2.33<br>(1.50)                             | 3,211    | 735                |
| Model 12 | X                    | X                       |               | -0.09<br>(0.72)          | 4,324    | 748                | -1.76<br>(1.49)                             | 3,211    | 735                |
| Model 13 | X                    |                         | X             | 3.83***<br>(0.77)        | 4,318    | 745                | -2.18*<br>(1.28)                            | 3,199    | 729                |
| Model 14 | X                    | X                       | X             | 0.03<br>(0.78)           | 4,318    | 745                | -0.16<br>(1.30)                             | 3,199    | 729                |

\*\*\*  $p < .01$ , \*  $p < .10$

Note: Heteroskedasticity-consistent standard errors, clustered on hospitals, are displayed in parentheses ( )

Table A6. Estimates of the Effect of the MassHealth P4P program on Process Quality: Highest quartile of Medicaid share discharges

|          | <i>Fixed Effects</i> | <i>Difficulty Index</i> | <i>Trends</i> | <u><i>Pneumonia</i></u>  |          |                    | <u><i>Surgical Infection Prevention</i></u> |          |                    |
|----------|----------------------|-------------------------|---------------|--------------------------|----------|--------------------|---------------------------------------------|----------|--------------------|
|          |                      |                         |               | <i>MassHealth effect</i> | <i>N</i> | <i>N hospitals</i> | <i>MassHealth effect</i>                    | <i>N</i> | <i>N hospitals</i> |
| Model 15 | X                    |                         |               | 0.33<br>(0.85)           | 4,928    | 836                | -6.26***<br>(2.03)                          | 3,343    | 787                |
| Model 16 | X                    | X                       |               | -0.86<br>(0.84)          | 4,928    | 836                | -5.54***<br>(2.01)                          | 3,343    | 787                |
| Model 17 | X                    |                         | X             | 5.33***<br>(1.15)        | 4,928    | 836                | 1.03<br>(1.71)                              | 3,327    | 779                |
| Model 18 | X                    | X                       | X             | 0.98<br>(1.16)           | 4,928    | 836                | 2.01<br>(1.83)                              | 3,327    | 779                |

\*\*\*  $p < .01$

Note: Heteroskedasticity-consistent standard errors, clustered on hospitals, are displayed in parentheses ( )



Table A7. Effect of MassHealth on quality trend for pneumonia

| VARIABLES                     | Model 19           |
|-------------------------------|--------------------|
| Time                          | -0.10<br>(0.18)    |
| Time <sup>2</sup>             | -0.03<br>(0.03)    |
| Time · MA                     | -1.21<br>(0.81)    |
| Time · Post                   | -1.03***<br>(0.26) |
| Time <sup>2</sup> · Post      | 0.20***<br>(0.05)  |
| Time <sup>2</sup> · MA        | 0.19<br>(0.14)     |
| Time · MA · Post              | 0.02<br>(0.55)     |
| Time <sup>2</sup> · MA · Post | -0.04<br>(0.12)    |
| Difficulty Index              | 1.25***<br>(0.07)  |
| Observations                  | 19,627             |
| R-squared                     | 0.580              |
| Number of id                  | 3,385              |

\*\*\*  $p < .01$ , \*\* $p < .05$ , \*  $p < .10$

Note: Heteroskedasticity-consistent standard errors, clustered on hospitals, are displayed in parentheses ( )

Figure A1. Pneumonia composite quality by Medicaid status

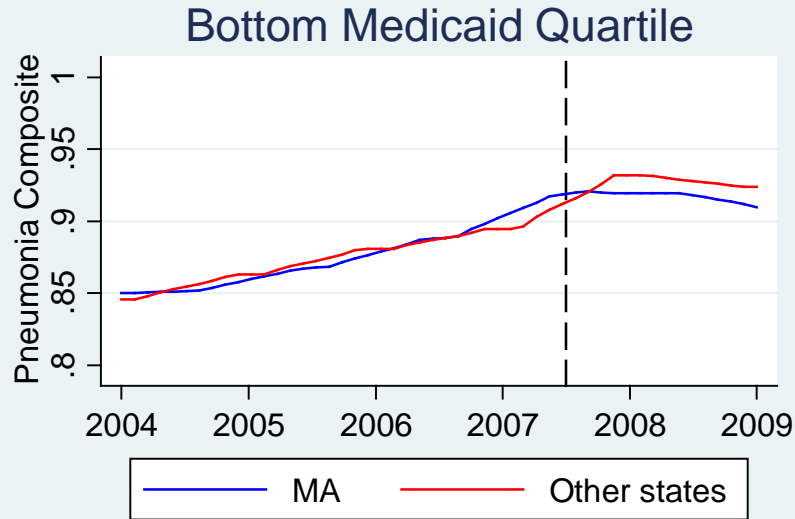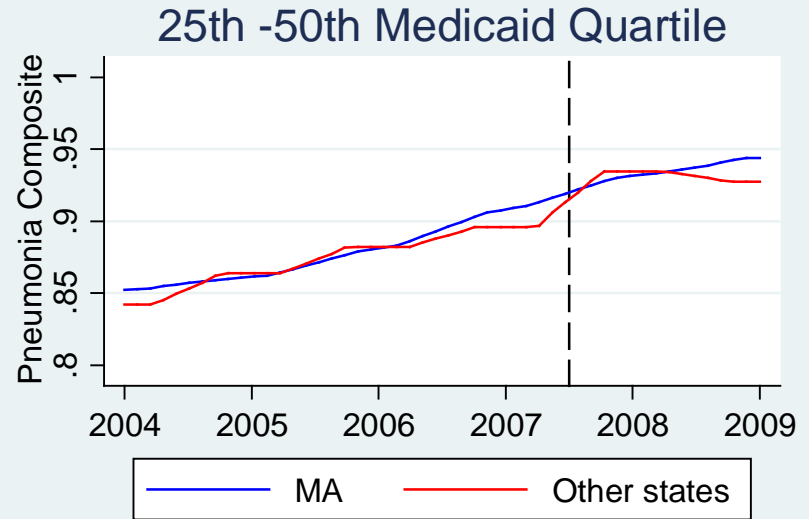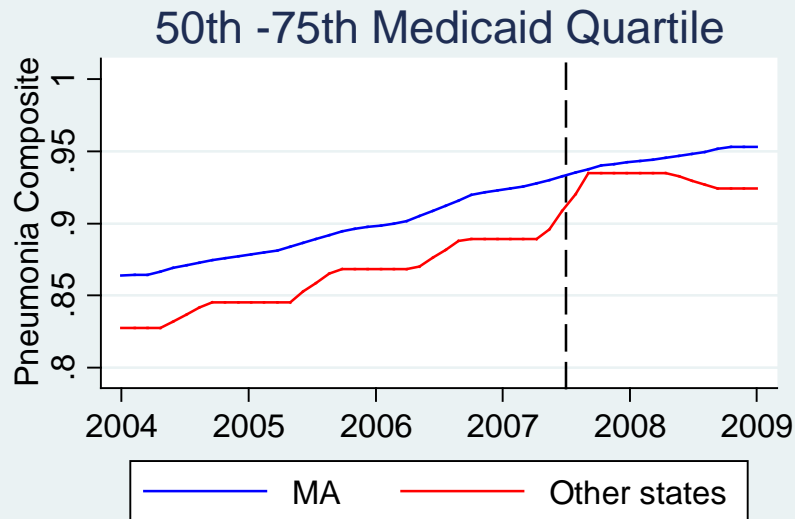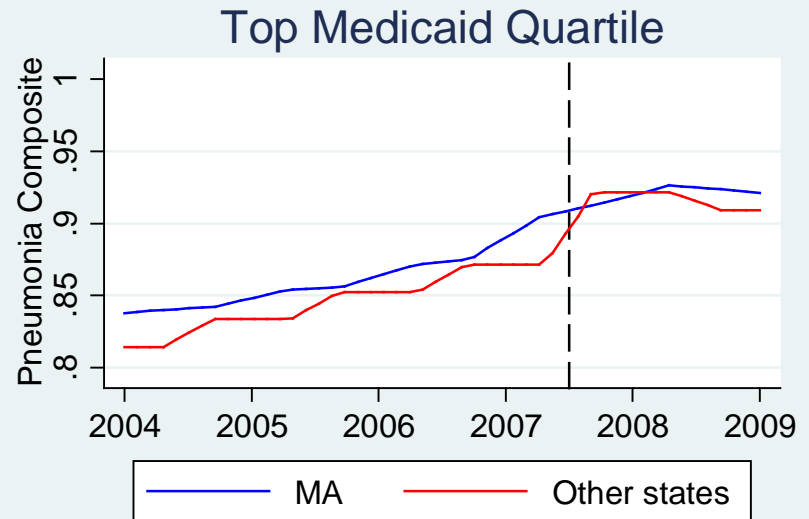

Figure A2. SIP composite quality by Medicaid status

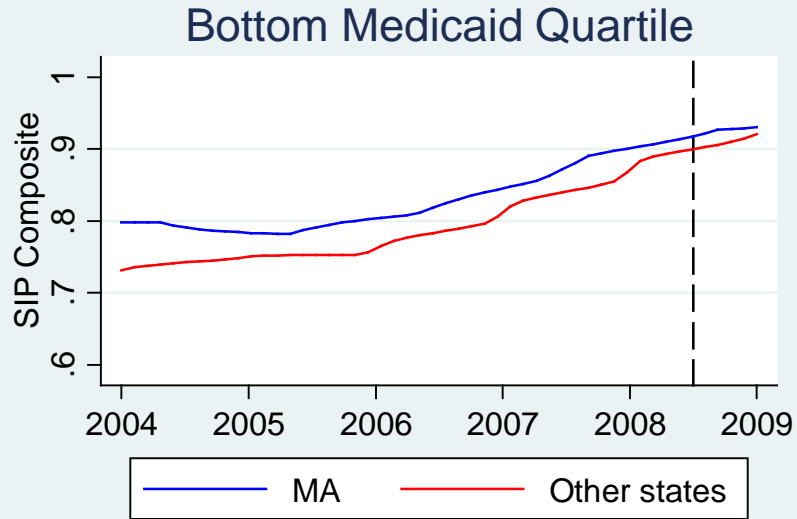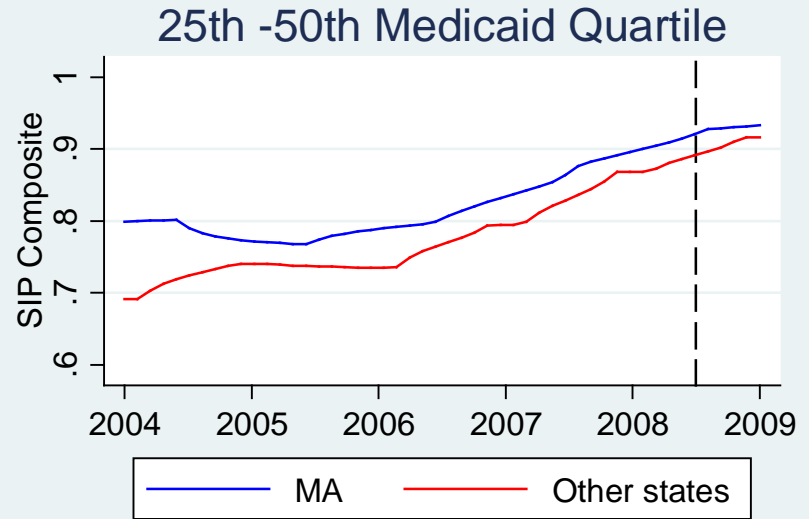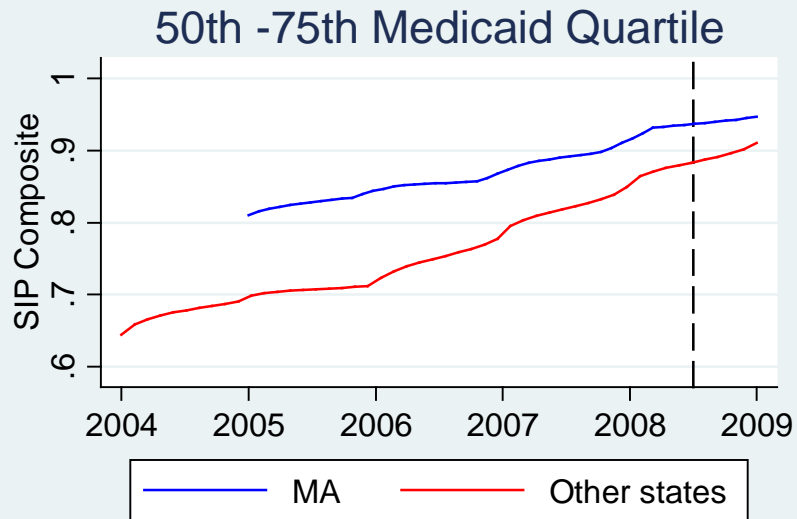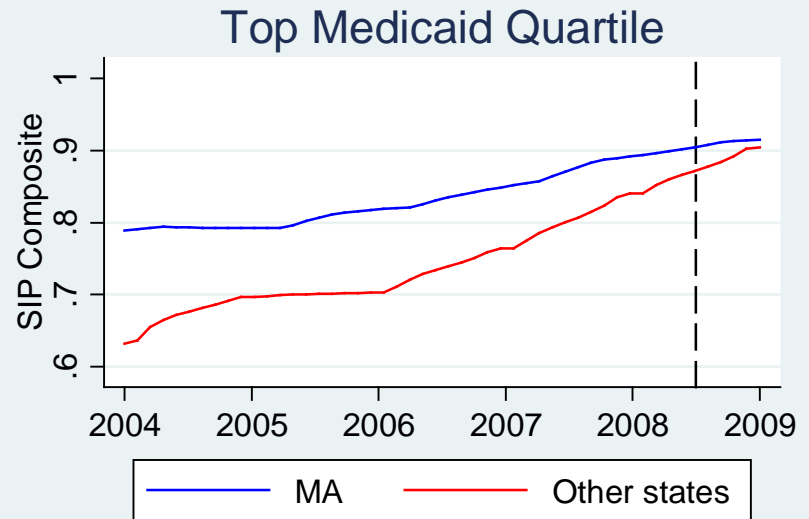

Supplement: hesr0046-0712-SD2.pdf [file hesr0046-0712-SD2.pdf]
